# Supplementary material for: Multi-component assembly of the bicyclic core associated with the tRNA synthetase inhibitors SB-203207 and SB-203208. Application to the synthesis of biologically active analogues.
Source: Royal Society of Chemistry journal article supplement (doi:10.1039/b104890m), 2001-10-11
Supplement: b104890m.doc [file b104890m.doc]

**Multi-component assembly of the bicyclic core associated with the tRNA synthetase inhibitors SB-203207 and SB-203208. Application to the synthesis of biologically active analogues**

Martin G. Banwell,** a* Curtis F. Crasto,*a* Christopher J. Easton,** a* Tomislav Karoli,*a* Darren R. March,*a* Michael R. Nairn,*a* Peter J. O’Hanlon,*b* Mark D. Oldham,*a* Anthony C. Willis*a* and Weimin Yue*a*

*a Research School of Chemistry, Institute of Advanced Studies, The Australian National University, Canberra, ACT 0200, Australia. E-mail: mgb@rsc.anu.edu.au*

*b GlaxoSmithKline, New Frontiers Science Park, Harlow CM19 5AW, UK.*

**SUPPLEMENTARY INFORMATION**

*Selected spectral data* for (+)-**5**: 13C NMR (75.5 MHz, CD3OD) d 220.9, 174.0, 147.2, 100.3, 48.2, 45.2, 43.1, 36.8, 33.8, 29.3; 1H NMR (300MHz, CD3OD) d 7.37 (s, 1H), 3.29 (m, 1H), 3.17 (m, 2H), 3.02 (s, 3H), 2.66 (m, 1H), 2.48–2.35 (complex m, 1H), 2.31 (m, 2H), 1.80 (m, 1H) (signals due to NH2 not observed); nmax (KBr) 3402, 3324, 3223, 1727, 1663, 1646 cm-1; *m/z* (EI, 70 eV) 194 (M+, 83%), 179 [(M-CH3)+, 36], 165 [(M-CHO)+, 72], 150 (37), 137 (100). Found: M+., 194.1053; C, 61.4; H, 7.3; N, 14.2. C10H14N2O2 requires M+., 194.1055; C, 61.8; H, 7.3; N, 14.4%.

*Crystal data* for compound (±)-**21**: C24H37N4O6.5, *M*r = 485.58, *T* = 296(1) K, triclinic space group *P*1 (#2), *a* = 9.812(1) Å, *b* = 9.839(1) Å, *c* = 15.524(2) Å, *a* = 77.24(1)°, *b* = 71.55(1)°, *g* = 69.78(1)°, *V* = 1323.5(3) Å3, *D*c (*Z* = 2) = 1.218 g cm-3, *F*(000) = 522.00, *m*(CuK*a*) = 7.34 cm-1, semi-empirical absorption correction; 3923 unique data (2*Q*max = 120.1°), 3106 with *I* > 2*s*(*I*); *R* = 0.052, *wR* = 0.063, GOF = 2.95. Data were measured on a Rigaku AFC6R rotating anode diffractometer (graphite crystal monochromator, *l* = 1.54178 Å). Refinement was by full-matrix least squares analysis on *F* using the teXsan structure analysis software of Molecular Structure Corporation.1 Atomic coordinates, bond lengths and angles, and thermal parameters have been deposited at the Cambridge Crystallographic Data Centre. CCDC 165269. See hhtp://www.rsc.org/suppdata/cc/b1/ b104890m/ for crystallographic data in .cif or other format.

*HPLC data*: Resolution of racemate **21** was performed with a 250 x 4.6 mm CHIRALPAK AS analytical HPLC column (purchased from Daicel Chemical Industries Ltd, Japan) using ethanol as eluent and a flow rate of 0.6 mL min-1. Retention times: (–)-**21** 7.8 min; (+)-**21** 9.9 min.

**Reference:**

1 *teXsan: Single Crystal Structure Analysis Software*, version 1.8, Molecular Structure Corporation, The Woodlands, TX 77381, USA, 1997.
